# Supplementary material for: Hydrogen-bond quenching of photodecarbonylation in the solid state and recovery of reactivity by co-crystallization
Source: Royal Society of Chemistry journal article supplement (doi:10.1039/b700073a), 2007-01-01
Supplement: b700073a.pdf [file b700073a.pdf]

## **Hydrogen-bond quenching of photodecarbonylation in the solid state and recovery of reactivity by crystal engineering**

Jing Zhang, Milan Gembicky, Marc Messerschmidt, Philip Coppens

*Department of Chemistry, State University of New York at Buffalo, Buffalo,  
New York, 14260-3000, USA. E-mail: coppens@buffalo.edu;*

Fax: (716)645-6948

### **Supporting Information**

All starting materials were purchased from commercial sources and used as received unless stated otherwise.

<sup>1</sup>H (500 MHz) spectra were recorded on Varian Inova-500 (broadband) spectrometers or Varian Inova-400 (broadband) spectrometers. Chemical shifts (in ppm) are given relative to non-deuterated DMSO. UV/Vis spectra were recorded on a Perkin-Lambda 35 UV/Vis spectrophotometer. Steady-state excitation and emission spectra were obtained on SPEX 1681 Fluorolog-2 series F111AI or SPEX Fluorolog-3 spectrophotometers. IR spectra were collected on a Perkin Elmer 1760 Infrared spectrometer. Melting points were determined either on a by a Perkin-Elmer DSC-7/TGA-7 in a conventional melting point tube. Room temperature irradiation of powdered crystalline samples was carried out with a 100W Oriel Mercury Arc Lamp. For low temperature irradiation of single crystals a 325nm Helium Cadmium laser system (40mW) was used. Elemental analysis was

performed by Department of Inorganic Chemistry, of the Slovak Technical University, Bratislava, Slovakia.

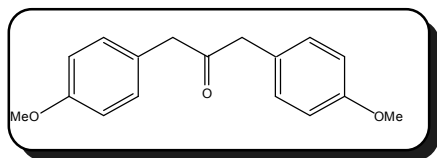

*Bis(4-methoxybenzyl) ketone* was synthesized

according to a slightly modified known procedure.<sup>1</sup> *p*-Methoxyphenylacetic acid (16.6g, 100 mmol) was ground with BaCO<sub>3</sub> (30g 150mmol). The mixture was then intensively stirred at 140°C without solvent for 4h until gas evolution ceased. The resulting solid was ground and dried under vacuum. The product was distilled off under vacuum and purified by recrystallization from diethyl ether to eliminate the side product 4-methoxybenzeneacetic acid methyl ester (yield 40%). Yield 33%. <sup>1</sup>H NMR (500 MHz, CDCl<sub>3</sub>) δ = 3.64 (s, 4H, α-hydrogen), 3.80 (s, 6H, *p*-methyoxyl), 6.85 (d, 4H, <sup>3</sup>*J*<sub>HH</sub> = 8.5 Hz, aryl H), 7.05 (d, 4H, <sup>3</sup>*J*<sub>HH</sub> = 8.5 Hz, aryl H)

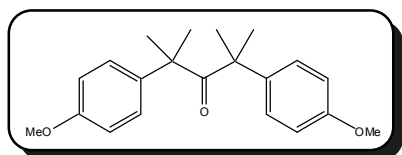

*2, 2, 4, 4-Tetramethyl -1,3 di(4-methoxyphenyl)acetone*

was prepared from bis(4-methoxybenzyl) ketone according to reference 2. The pure compound was obtained by recrystallization from ethanol in a yield of 90%. <sup>1</sup>H NMR (500 MHz, CDCl<sub>3</sub>, ): δ = 1.27 (s, 12H, α-methyl), 3.80 (s, 6H, *p*-methyoxyl), 6.78 (d, 4H, <sup>3</sup>*J*<sub>HH</sub> = 8.5 Hz, aryl H), 7.07 (d, 4H, <sup>3</sup>*J*<sub>HH</sub> = 8.5 Hz, aryl H). IR (KBr cm<sup>-1</sup>): 2970, 1683,

1 R. Ruzicka, L. Baráková, P. Klán, *J. Phys. Chem. B* **2005**, 109, 9346-9353.

2 M. J. E. Resendiz, M. A. Garcia-Garibay, *Org. Lett.* **2005**, 7, 371-374

1608, 1580, 1511, 1465, 1298, 1253, 1187, 1032, 995, 826, 810, 585, 542. HRMS (ESI)  $m/z$  ( $M^+$ ) calcd for  $C_{21}H_{26}O_3Na$  [ $M+Na$ ] $^+$ , 349.1774, found 349.1767.

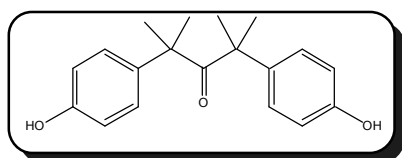

**2, 2, 4, 4-Tetramethyl -1,3 di(4-hydroxyphenyl)acetone 1**

was prepared by demethylation of 2, 2, 4, 4-Tetramethyl -1,3 di(4-methoxyphenyl)acetone (1g) in molten pyridine hydrochloride (10g) at 200°C for 2h. The resulting warm mixture was poured into ice water. A white powder was collected by filtration and recrystallized from chloroform for purification. Yield 88%.  $^1H$  NMR (400 MHz,  $d^6$ -DMSO,  $\delta$ ):  $\delta$ =1.16 (s, 12H,  $\alpha$ -methyl), 6.68 (d, 4H,  $^3J_{HH}$  = 8.4 Hz, aryl H), 6.95 (d, 4H,  $^3J_{HH}$  = 8.5 Hz, aryl H), 9.34 (s, hydroxyl). IR (KBr  $cm^{-1}$ ): 3360, 2970, 1659, 1611, 1595, 1513, 1475, 1451, 1271, 1239, 1181, 1032, 993, 906, 827, 689, 588, 532. HRMS (EI)  $m/z$  ( $M^+$ ) calcd for  $C_{19}H_{22}O_3$ , 298.15634, found 298.15650. Melting Point 180°.

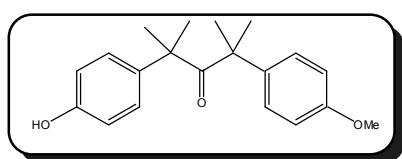

**2, 2, 4, 4-tetramethyl -1-(4-hydroxyphenyl)-3-(4-**

**methoxyphenyl)acetone 2**. 300mg(1mmol) of **1** and 162mg (0.5mmol)  $Cs_2CO_3$  in 20mL acetone was stirred for 4h and then MeI(560mg 4mmol) in 5mL acetone was added dropwise. The reaction mixture was stirred overnight, water was added, followed by extraction with diethyl ether. The ether layer was dried over  $MgSO_4$  and evaporated under reduced pressure. Pure compound **2** was obtained by column chromatography, [silica, ether (20%)/hexanes (80%)]. Colorless crystals were obtained from the same

solvent mixture. Yield 45%.  $^1\text{H}$ NMR (400 MHz,  $\text{d}^6\text{-DMSO}$ , ):  $\delta$  =1.15 (s, 6H,  $\alpha$ -methyl H), 1.17 (s, 6H,  $\alpha'$ -methyl H), 3.73 (s, 3H, *p*-methyoxyl H), 6.67 (d, 2H,  $^3J_{\text{HH}}$  = 8.5 Hz, aryl H), 6.84 (d, 2H,  $^3J_{\text{HH}}$  = 9 Hz, aryl H), 6.93 (d, 2H,  $^3J_{\text{HH}}$  = 8.5 Hz, aryl H), 7.06 (d, 2H,  $^3J_{\text{HH}}$  = 8.5 Hz, aryl H), 9.32 (s, hydroxyl H). IR (KBr  $\text{cm}^{-1}$ ): 3257, 2971, 1679, 1610, 1512, 1460, 1294, 1254, 1186, 1035, 994, 831, 588, 541. HRMS (EI)  $m/z$  ( $\text{M}^+$ ) calcd for  $\text{C}_{20}\text{H}_{24}\text{O}_3$ , 312.17199, found 312.17192. Melting Point: 83-85.

**Synthesis and characterization of 1a:** To a solution of **1** (30mg 1mmol) in 10mL ether, 4,4'-biscyclohexanone (20mg 1mmol) was added. The resultant solution mixture was stirred at room temperature for 0.5h after which 20mL *n* hexane was added and the resulting solution was filtered. After overnight evaporation colorless crystals appeared. Yield: 40%.  $^1\text{H}$  NMR (500 MHz,  $\text{d}^6\text{-DMSO}$ , ):  $\delta$  =1.14 (s, 12H,  $\alpha$ -methyl), 1.41-1.47 (m, 4H), 1.68-1.72(m, 2H), 1.96-2.00 (m, 4H), 2.18-2.21(m, 4H), 2.34-2.41(m, 4H), 6.67 (d, 4H,  $^3J_{\text{HH}}$  = 8.5 Hz, aryl H), 6.94 (d, 4H,  $^3J_{\text{HH}}$  = 8.5 Hz, aryl H), 9.31 (s, hydroxyl). IR (KBr  $\text{cm}^{-1}$ ): 3254, 2968, 1685, 1611, 1593, 1509, 1472, 1265, 1231, 1180, 1032, 993, 836, 585, 543. Elemental analysis calc. for  $\text{C}_{31}\text{H}_{40}\text{O}_5$ : C 75.57, H 8.19; found C 75.95, H 8.63.

**Synthesis and characterization of 2a:** To a solution of **2** (32mg 1mmol) in 10mL ether, 4, 4'-biscyclohexanone (10mg 0.5mmol) was added. The resultant solution mixture was stirred at room temperature 0.5h and then 20mL *n*hexane was added. The solution was filtered. After overnight evaporation the colorless crystals appeared in the bottom of beaker. Yield: 80%.  $^1\text{H}$  NMR (500 MHz,  $\text{d}^6\text{-DMSO}$ , ):  $\delta$  =1.15 (s, 6H,  $\alpha$ -methyl H), 1.17 (s, 6H,  $\alpha'$ -methyl H), 1.42-1.47 (m, 2H), 1.68-1.71(m, 1H), 1.96-2.00 (m, 2H), 2.18-

2.22(m, 2H), 2.34-2.42(m, 2H), 3.73 (s, 3H, *p*-methyoxyl H), 6.67 (d, 2H,  $^3J_{\text{HH}} = 8.5$  Hz, aryl H), 6.84 (d, 2H,  $^3J_{\text{HH}} = 9$  Hz, aryl H), 6.93 (d, 2H,  $^3J_{\text{HH}} = 8.5$  Hz, aryl H), 7.06 (d, 2H,  $^3J_{\text{HH}} = 8.5$  Hz, aryl H), 9.32 (s, hydroxyl H). IR (KBr  $\text{cm}^{-1}$ ): 3263, 2971, 1698, 1685, 1613, 1590, 1513, 1461, 1255, 1232, 1185, 1031, 994, 825, 583, 543. Elemental analysis calc. for  $\text{C}_{52}\text{H}_{62}\text{O}_4 \cdot \text{H}_2\text{O}$ : C 74.96, H 7.75; found C 74.97, H 8.13.

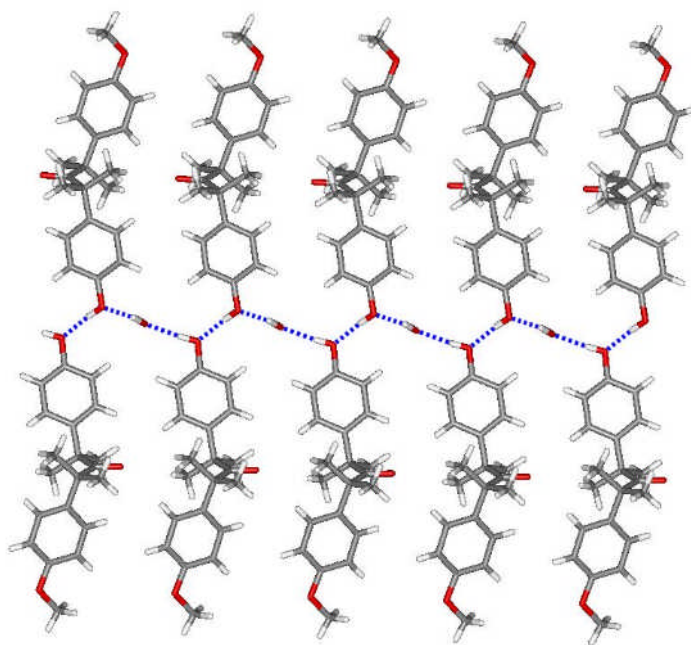

**Fig. S1.** Hydrogen bonding in **2** Intermolecular hydrogen bond distances (Å): O2...O5A 2.75, O5...O7 (water) 2.60, O2...O7 (water) 2.71

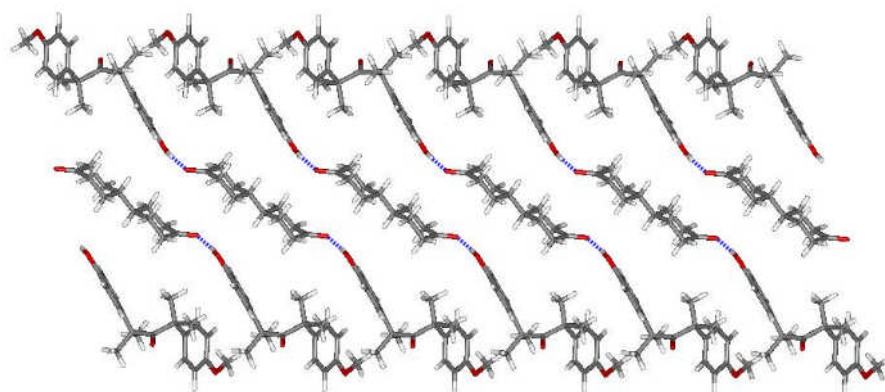

**Fig. S2.** Hydrogen bonding in **2** Intermolecular hydrogen bond distances (Å): O3...O4  
2.72

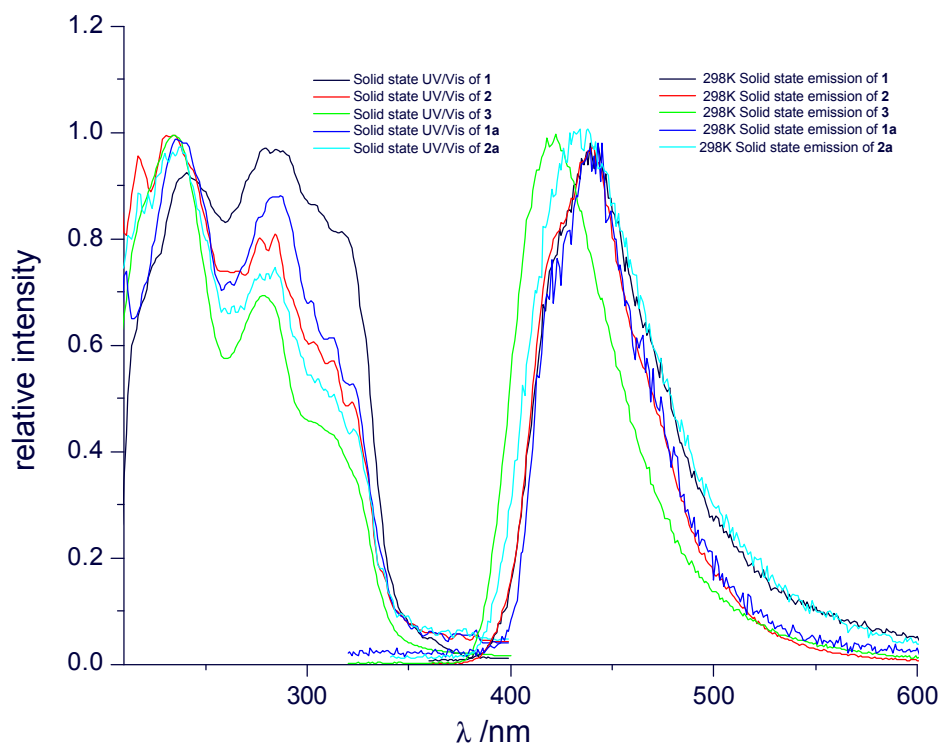

**Fig. S3.** Solid state UV/Vis absorption spectra and solid state emission of **1**, **2**, **3**, **1a** and **2a** at 298K. Excitation wavelength 350nm

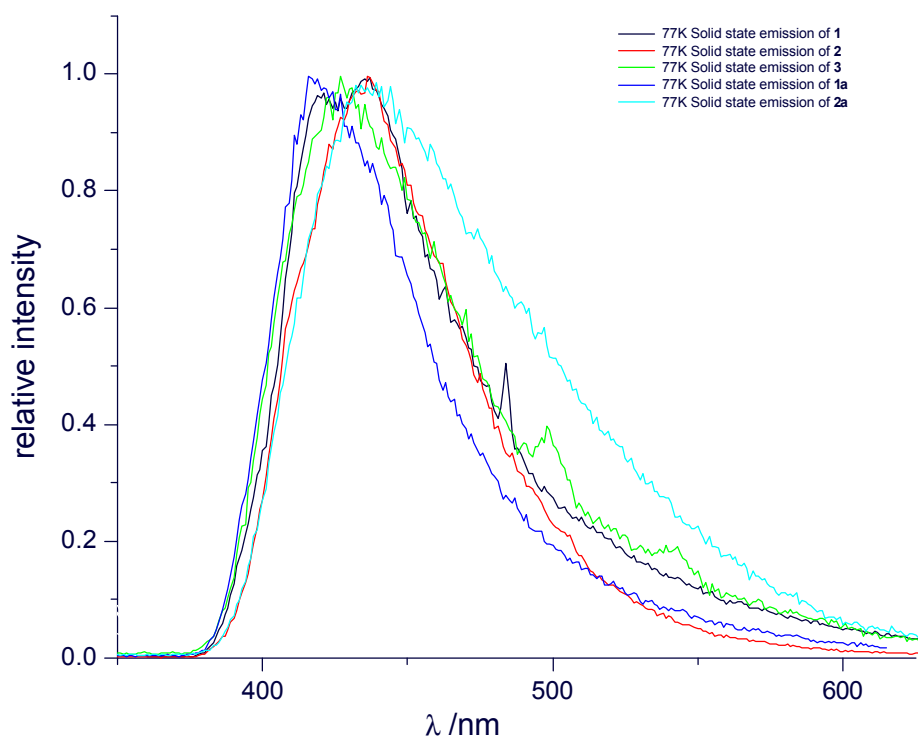

**Fig. S4.** Solid state emission of **1**, **2**, **3**, **1a** and **2a** at 77K, excitation wavelength 350nm

| Compound name | D-H    | A                           | Hydrogen bond distance D...A (Å) |
|---------------|--------|-----------------------------|----------------------------------|
| <b>1</b>      | O2-H2A | O3 (hydroxyl-)              | 2.771                            |
|               | O3-H3A | O1 (carbonyl)               | 2.718                            |
| <b>2</b>      | O2-H2A | O5 (carbonyl)               | 2.754                            |
|               | O5-H5A | O7 (water)                  | 2.595                            |
|               | O7-H7D | O2 (carbonyl)               | 2.707                            |
| <b>1a</b>     | O2-H2A | O4 (carbonyl from template) | 2.760                            |
|               | O3-H3A | O5 (carbonyl from template) | 2.735                            |
| <b>2a</b>     | O3-H3A | O4 (carbonyl from template) | 2.719                            |

**Table S1. Hydrogen bonding in compounds 1, 2, 1a and 2a**

| Compound  | Carbonyl Frequency (cm <sup>-1</sup> ) |
|-----------|----------------------------------------|
| <b>1</b>  | 1659                                   |
| <b>2</b>  | 1679                                   |
| <b>3</b>  | 1683                                   |
| <b>1a</b> | 1685                                   |
| <b>2a</b> | 1698, 1682                             |

**Table S2. Carbonyl stretching frequencies for compounds 1, 2, 3, 1a and 2a.**

|       | a (Å)     | b          | c           | $\alpha$ (°) | $\beta$     | $\gamma$    |
|-------|-----------|------------|-------------|--------------|-------------|-------------|
| 90K   | 7.7478(3) | 11.0122(4) | 16.6440(7)  | 109.248(1)   | 92.649(1)   | 90.731(1)   |
| 15min | 7.7750(3) | 11.0364(5) | 16.6918(7)  | 109.3888(12) | 93.1995(13) | 90.5739(13) |
| 20min | 7.8085(5) | 11.0256(7) | 16.7261(11) | 109.358 (2)  | 93.814 (2)  | 90.406 (2)  |

**Table S3. Unit cell dimensions of 1a after different irradiation times with 325nm laser light.**
